# Supplementary material for: Digital light processing 3D printing of modified liquid isoprene rubber using thiol-click chemistry
Source: Royal Society of Chemistry journal article supplement (doi:10.1039/d0ra04186f), 2020-01-01
Supplement: d0ra04186f1.pdf [file d0ra04186f1.pdf]

## Supporting Information

### Digital light processing 3D-printing of modified liquid isoprene rubber using thiol-click chemistry

Lara Strohmeier,<sup>a</sup> Heike Frommwald,<sup>a</sup> and Sandra Schlögl<sup>a,\*</sup>

<sup>a</sup>Polymer Competence Center Leoben GmbH, Roseggerstrasse 12, A-8700 Leoben, Austria

e-mail: sandra.schloegl@pccl.at

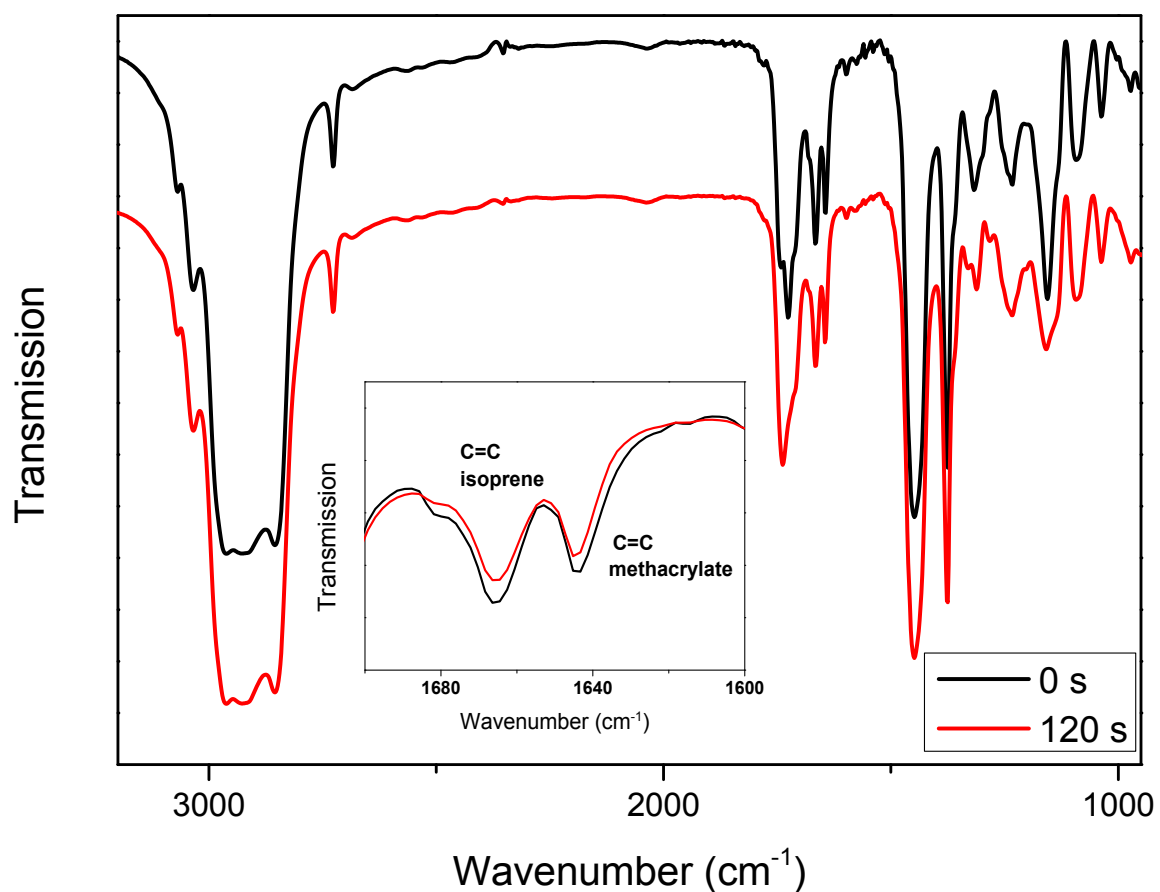

**Figure S1** – FT-IR spectra of LIR-REF prior to and after UV exposure. Inset shows the decrease of the characteristic C=C absorption bands for the isoprene and methacrylate groups upon UV exposure.

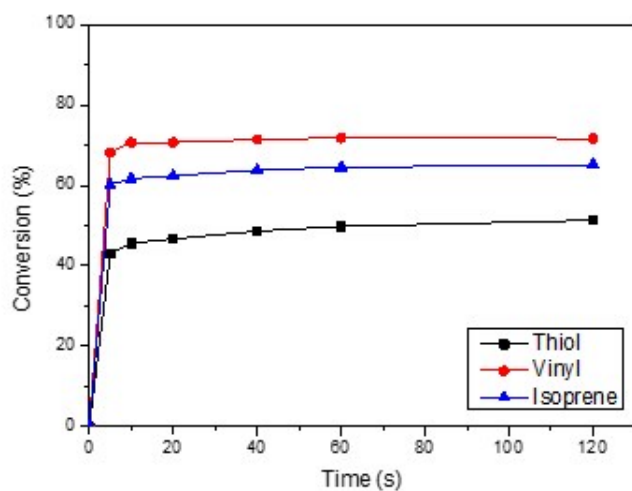

(a)

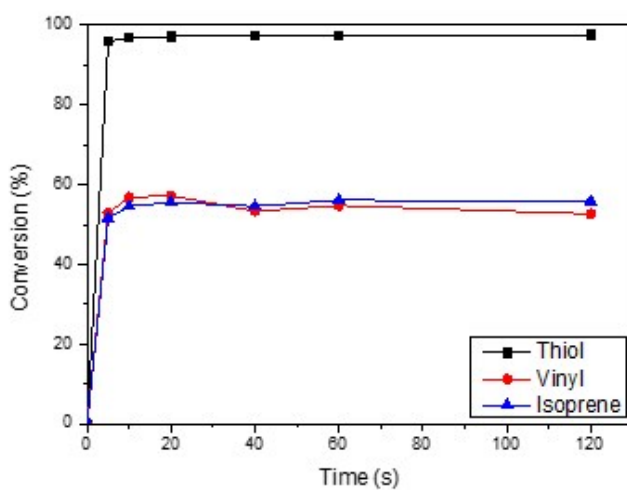

(b)

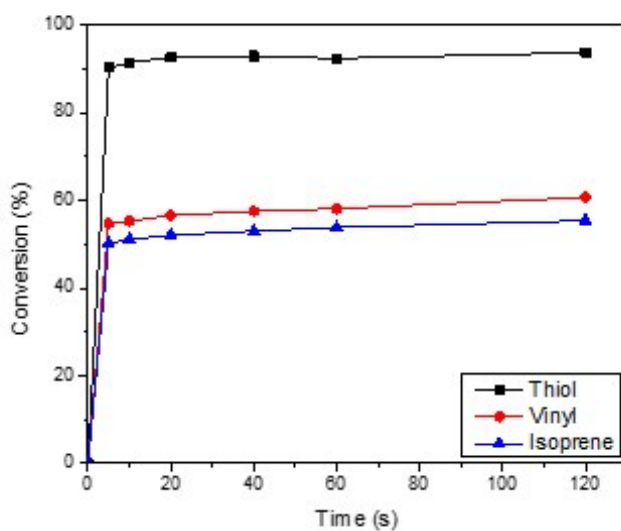

(c)

**Figure S2** - Cure kinetics of stabilized DLP 3D printable rubber formulations: (a) **LIR-SH-BD**, (b) **LIR-SH-DEG** and (c) **LIR-SH-TEG**.

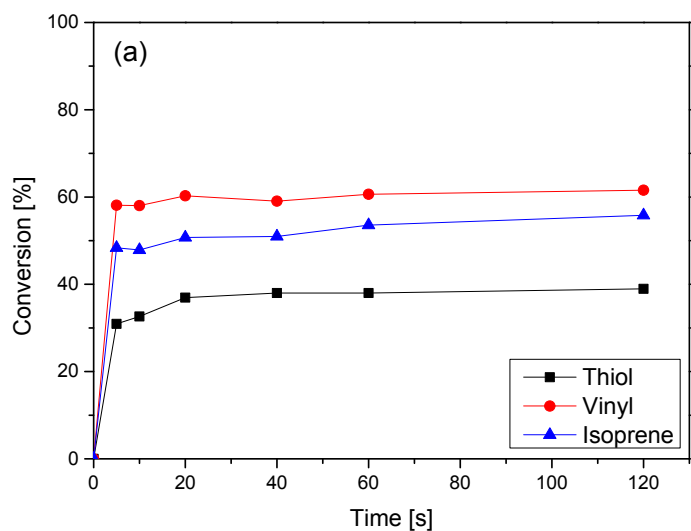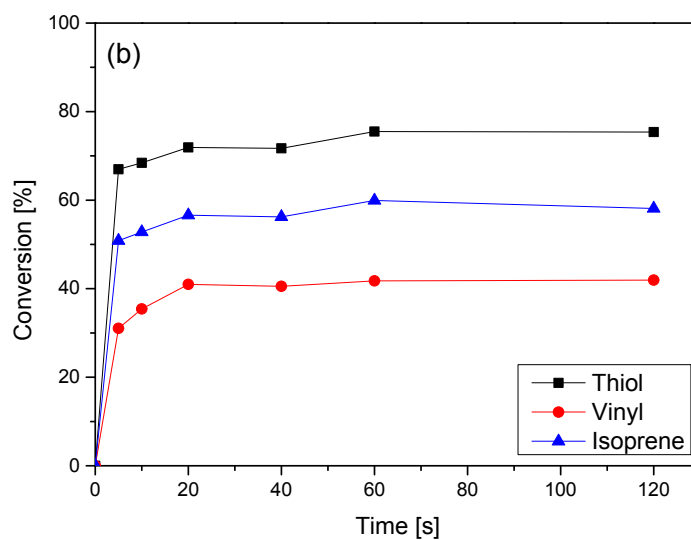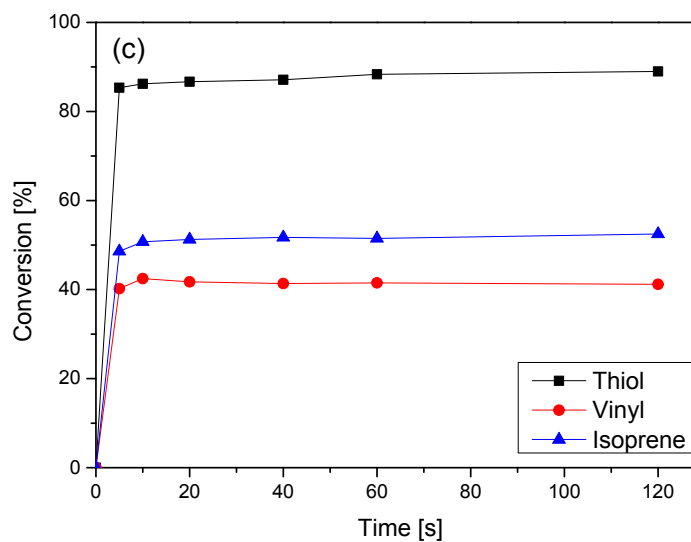

**Figure S3** - Cure kinetics of non-stabilized DLP 3D printable rubber formulations: (a) **LIR-SH-BD**, (b) **LIR-SH-DEG** and (c) **LIR-SH-TEG**.

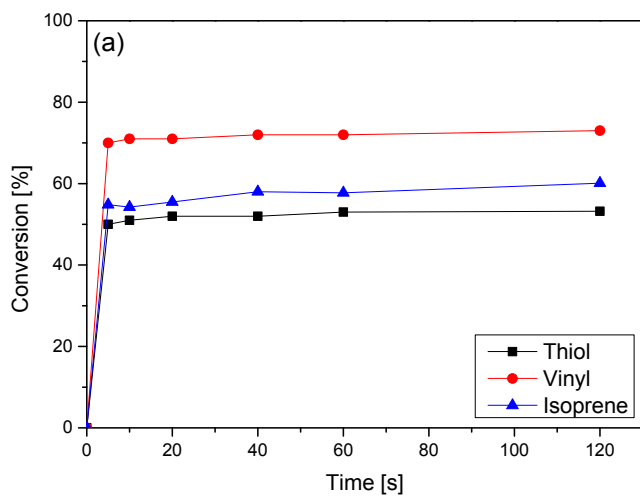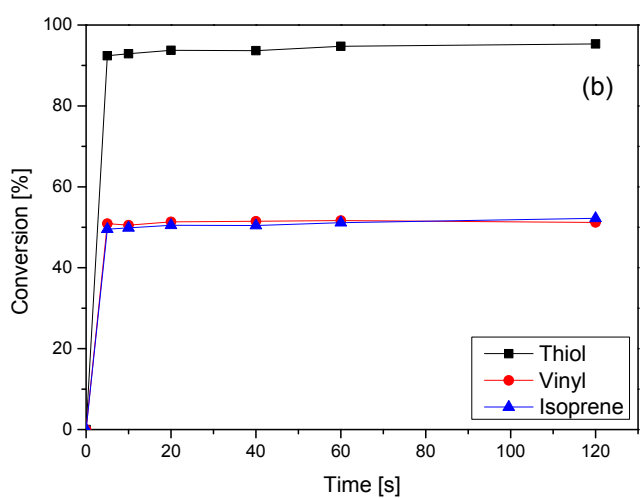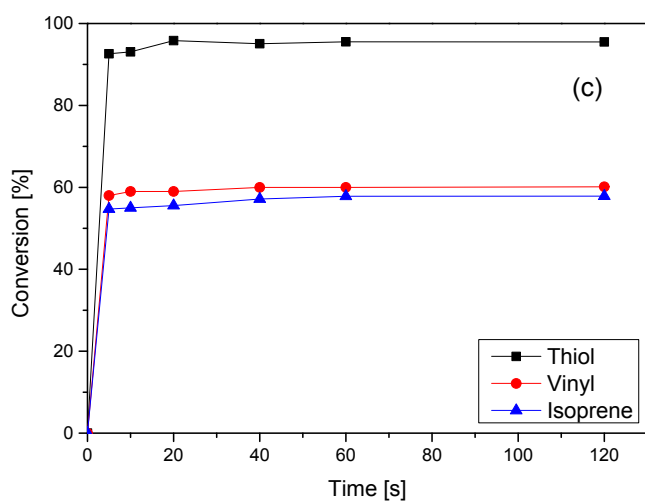

**Figure S4** - Cure kinetics of stabilized DLP 3D printable rubber formulations containing 0.01 wt% Sudan II: (a) LIR-SH-BD, (b) LIR-SH-DEG and (c) LIR-SH-TEG.

**Table S1** - Monomer conversion of the stabilized and non-stabilized formulations after 120 s of irradiation.

| formulation     | concentration of pyrogallol / wt% | concentration of Sudan II / wt% | conversion thiol groups (%) | conversion vinyl groups (%) | conversion main chain C=C groups (%) |
|-----------------|-----------------------------------|---------------------------------|-----------------------------|-----------------------------|--------------------------------------|
| LIR-SH-BD-ns    | -                                 | -                               | 39                          | 62                          | 56                                   |
| LIR-SH-DEG-ns   | -                                 | -                               | 75                          | 42                          | 58                                   |
| LIR-SH-TEG-ns   | -                                 | -                               | 89                          | 41                          | 52                                   |
| LIR-SH-BD-PyrS  | 0.1                               | 0.01                            | 53                          | 73                          | 60                                   |
| LIR-SH-DEG-PyrS | 0.1                               | 0.01                            | 95                          | 53                          | 52                                   |
| LIR-SH-TEG-PyrS | 0.1                               | 0.01                            | 95                          | 61                          | 58                                   |
